# Supplementary material for: Structure and luminescence of a novel orange-yellow-emitting Ca1.62Eu0.38Si5O3N6phosphor for warm white LEDs, discovered by a single-particle-diagnosis approach
Source: Royal Society of Chemistry journal article supplement (doi:10.1039/c6tc02714h), 2016-01-01
Supplement: c6tc02714h1.pdf [file c6tc02714h1.pdf]

## Electronic Supplementary Information

### Structure and luminescence of a novel orange-yellow-emitting $\text{Ca}_{1.62}\text{Eu}_{0.38}\text{Si}_5\text{O}_3\text{N}_6$ phosphor for warm white LEDs, discovered by a single-particle-diagnosis approach

Xiao-Jun Wang,<sup>a,b</sup> Shiro Funahashi,<sup>b</sup> Takashi Takeda,<sup>b</sup> Takayuki Suehiro,<sup>b</sup> Naoto Hirosaki,<sup>b</sup> Rong-Jun Xie<sup>b,c,\*</sup>

<sup>a</sup>Jiangsu Key Laboratory of Advanced Laser Materials and Devices, School of Physics and Electronic Engineering, Jiangsu Normal University, Xuzhou, 221116, China.

<sup>b</sup>Sialon Group, Environment and Energy Materials Division, National Institute for Materials Science (NIMS), Namiki, Tsukuba, Ibaraki, 305-0044, Japan.

<sup>c</sup>College of Materials, Xiamen University, 422 Siming road, Xiamen, 361005, China.

\*Correspondence - Xie.Rong-Jun@nims.go.jp

Table S1. Anisotropic displacement parameters ( $\text{\AA}^2$ ) of  $\text{Ca}_{1.62}\text{Eu}_{0.38}\text{Si}_5\text{O}_3\text{N}_6$ .

| Atom | $U^{11}$ | $U^{22}$ | $U^{33}$ | $U^{12}$ | $U^{13}$ | $U^{23}$ |
|------|----------|----------|----------|----------|----------|----------|
| Ca1  | 0.007    | 0.0049   | 0.0065   | 0.0003   | 0.0041   | 0.0001   |
| Ca2  | 0.0052   | 0.0057   | 0.0064   | 0.001    | 0.0023   | -0.0008  |
| Ca3  | 0.0058   | 0.006    | 0.0069   | -0.0009  | 0.0025   | 0.0008   |
| Ca4  | 0        | 0        | 0        | 0        | 0        | 0        |
| Ca5  | 0        | 0        | 0        | 0        | 0        | 0        |
| Ca6  | 0        | 0        | 0        | 0        | 0        | 0        |
| Ca7  | 0.0181   | 0.0154   | 0.0175   | 0        | 0.0045   | 0        |
| Ca8  | 0.0171   | 0.0123   | 0.0205   | 0        | 0.0064   | 0        |
| Eu1  | 0.0181   | 0.0154   | 0.0175   | 0        | 0.0045   | 0        |
| Eu2  | 0.0171   | 0.0123   | 0.0205   | 0        | 0.0064   | 0        |
| Si1  | 0.0029   | 0.0036   | 0.0034   | -0.0002  | 0.0008   | -0.0004  |
| Si2  | 0.003    | 0.0047   | 0.0029   | -0.0001  | 0.0009   | 0        |
| Si3  | 0.0027   | 0.0035   | 0.003    | 0        | 0.0006   | -0.0003  |
| Si4  | 0.0035   | 0.0045   | 0.0034   | 0.0006   | 0.0008   | -0.0005  |
| Si5  | 0.0026   | 0.0031   | 0.0046   | -0.0001  | 0.0013   | 0.0004   |
| Si6  | 0.0032   | 0.0029   | 0.0031   | 0        | 0.001    | -0.0003  |
| Si7  | 0.0028   | 0.0041   | 0.003    | 0        | 0.0008   | 0.0003   |
| Si8  | 0.0015   | 0.0045   | 0.0033   | 0.0002   | 0.0002   | 0        |
| Si9  | 0.0046   | 0.0036   | 0.0043   | -0.0004  | 0.0021   | 0        |
| Si10 | 0.0027   | 0.0035   | 0.0033   | -0.0003  | 0.0008   | 0.0003   |
| N1   | 0.008    | 0.004    | 0.008    | 0        | 0.001    | 0        |
| N2   | 0.008    | 0.002    | 0.011    | 0        | 0.004    | 0        |
| N3   | 0.0045   | 0.0052   | 0.0021   | -0.0014  | -0.0006  | 0.0008   |
| N4   | 0.009    | 0.006    | 0.01     | 0        | 0.001    | 0        |
| N5   | 0.0045   | 0.0062   | 0.0064   | 0.001    | 0.0046   | 0.0006   |
| N6   | 0.0035   | 0.0064   | 0.0039   | 0.0016   | 0.0024   | 0.0015   |
| N7   | 0.0058   | 0.0076   | 0.0051   | -0.0025  | 0.0034   | -0.0028  |
| N8   | 0.005    | 0.0081   | 0.0033   | -0.0018  | 0.0024   | -0.0019  |
| N9   | 0.0043   | 0.006    | 0.0043   | -0.0005  | 0.0016   | 0.001    |
| N10  | 0.0056   | 0.0087   | 0.0037   | 0.0052   | 0.0018   | 0.0005   |
| N11  | 0.006    | 0.001    | 0.0009   | 0        | 0.0008   | 0        |
| N12  | 0.0011   | 0.0084   | 0.0044   | 0.0007   | 0.0006   | -0.0003  |
| N13  | 0.0046   | 0.0059   | 0.0038   | 0.0007   | 0.0014   | 0.0002   |
| N14  | 0.0057   | 0.0075   | 0.002    | 0.0014   | 0.0008   | -0.0004  |
| O1   | 0.0082   | 0.0051   | 0.0094   | 0.0026   | 0.0014   | -0.0014  |
| O2   | 0.0083   | 0.005    | 0.008    | -0.0008  | 0.0024   | -0.0019  |
| O3   | 0.0097   | 0.0046   | 0.0101   | 0.002    | 0.0045   | -0.0002  |
| O4   | 0.0042   | 0.0035   | 0.0137   | -0.0003  | 0.0026   | -0.0011  |
| O5   | 0.0069   | 0.0072   | 0.0094   | -0.002   | 0.0007   | -0.0018  |

O6      0.0079      0.0041      0.0082      -0.0008      0.0011      -0.0017

---
